# Supplementary material for: Do Different Patterns of Employment Quality Contribute to Gender Health Inequities in the U.S.? A Cross-Sectional Mediation Analysis
Source: MDPI journal article supplement (doi:10.3390/ijerph191811237), 2022-09-07
Supplement: s1 [file s1]

**Table S1. Conceptual dimensions and indicators used to operationalize employment quality (EQ) within the U.S. General Social Survey (GSS).**

| <b>EQ Dimensions</b>                                                                                                                            | <b>Indicators</b>                              | <b>GSS Item(s)</b>                                                                                                                             | <b>Operationalization</b>                                                                                                                              |
|-------------------------------------------------------------------------------------------------------------------------------------------------|------------------------------------------------|------------------------------------------------------------------------------------------------------------------------------------------------|--------------------------------------------------------------------------------------------------------------------------------------------------------|
| <b>Employment stability</b> - whether the expectation of employment is ongoing, as opposed to time-fixed or project-dependent                   | Employment contract                            | Type of work arrangement                                                                                                                       | 1) regular, permanent employment<br>2) independent contractor; working under a contractor; employment on an on-call basis, or paid by temporary agency |
| <b>Material Rewards</b> - labor income and employer-provided fringe benefits                                                                    | Income level                                   | Labor earnings                                                                                                                                 | 1) lowest quartile<br>2) second or third quartile<br>3) highest quartile                                                                               |
| <b>Workers' rights &amp; social protection</b> - labor protections provided to workers and the extent to which they are upheld in the workplace | Days of mandatory extra work hours             | Combines two items asking a) days per month work hours beyond usual schedule and b) if these hours were mandatory                              | 1) zero days<br>2) between 1 and 10 days<br>3) >11 days                                                                                                |
| <b>Working time arrangements</b> - timing, regularity, and quantity of working hours                                                            | Long working hours                             | Hours worked last week                                                                                                                         | 1) <24 hours<br>2) 25-36 hours<br>3) 37-48 hours<br>4) >48 hours                                                                                       |
|                                                                                                                                                 | Working times regularity                       | Work schedule                                                                                                                                  | 1) day shift<br>2) afternoon or night shift<br>3) split, irregular, on-call, or rotating shifts                                                        |
| <b>Employability opportunities</b> - whether a worker is able to develop skills/abilities                                                       | Training opportunities                         | Opportunity to develop abilities                                                                                                               | 1) yes ('very true' or 'somewhat true')<br>2) no ('not too true' or 'not at all true')                                                                 |
| <b>Collective organization</b> - whether employees have labor representation and open lines of communication with management                    | Have adequate training, equipment, information | Combines two items asking if workers a) have enough help and equipment, and b) enough information to get job done                              | 1) yes ('often' or 'sometimes' responses for both of these items)<br>2) no (responses of 'rarely' or 'never' on at least one)                          |
|                                                                                                                                                 | Union representation                           | Belong to labor union                                                                                                                          | 1) yes<br>2) no                                                                                                                                        |
| <b>Interpersonal power relations</b> - relations between workers, co-workers, superiors, and employers                                          | Employee involvement                           | Take part in work-related decisions that affect you                                                                                            | 1) 'often'<br>2) 'sometimes'<br>3) 'rarely' or 'never'                                                                                                 |
|                                                                                                                                                 | Control over schedule                          | Combines two items asking a) ability of workers to change starting/finishing times and b) ability to take off work for personal/family reasons | 1) high control (high or medium control on both items)<br>2) medium control<br>3) low control (low control on both items)                              |
|                                                                                                                                                 | Subjected to harassment/abuse                  | Combines two items indicating having been a) sexually harassed or b) threatened or harassed in any other way by anyone while at their job      | 1) yes ('yes' to either item)<br>2) no                                                                                                                 |

Notes: Conceptual framework of employment quality and choice of indicators adapted from Van Aerden et al. (2014, 2016).

**Table S2. Employment quality indicators by gender: Frequency (percent).**

| EQ indicator                                   | Response category        | Total<br>N = 6367 | Women<br>n = 3405 | Men<br>n = 2962 | p-value <sup>a</sup> |
|------------------------------------------------|--------------------------|-------------------|-------------------|-----------------|----------------------|
| <b>Employment arrangement</b>                  | Regular/permanent        | 5606 (88)         | 3052 (90)         | 2554 (86)       | <0.001               |
|                                                | Non-permanent            | 714 (11)          | 322 (9)           | 392 (13)        |                      |
|                                                | Missing                  | 47 (1)            | 31 (1)            | 16 (1)          |                      |
| <b>Income</b>                                  | Lowest income quartile   | 1456 (23)         | 978 (29)          | 478 (16)        | <0.001               |
|                                                | 2nd/3rd income quartile  | 2928 (46)         | 1558 (46)         | 1370 (46)       |                      |
|                                                | Highest income quartile  | 1087 (17)         | 389 (11)          | 698 (24)        |                      |
|                                                | Missing                  | 896 (14)          | 480 (14)          | 416 (14)        |                      |
| <b>Days of mandatory extra work hours</b>      | None                     | 4915 (77)         | 2757 (81)         | 2158 (73)       | <0.001               |
|                                                | 1-10 days                | 897 (14)          | 424 (12)          | 473 (16)        |                      |
|                                                | 11+ days                 | 387 (6)           | 135 (4)           | 252 (9)         |                      |
|                                                | Missing                  | 168 (3)           | 89 (3)            | 79 (3)          |                      |
| <b>Working hours</b>                           | <24                      | 646 (10)          | 429 (13)          | 217 (7)         | <0.001               |
|                                                | 25-36                    | 834 (13)          | 599 (18)          | 235 (8)         |                      |
|                                                | 37-48                    | 3217 (51)         | 1738 (51)         | 1479 (50)       |                      |
|                                                | >48                      | 1643 (26)         | 623 (18)          | 1020 (34)       |                      |
|                                                | Missing                  | 27 (0)            | 16 (0)            | 11 (0)          |                      |
| <b>Working times regularity</b>                | Day shift                | 4658 (73)         | 2529 (74)         | 2129 (72)       | 0.017                |
|                                                | Afternoon/night shift    | 771 (12)          | 402 (12)          | 369 (12)        |                      |
|                                                | Split/irregular/rotating | 895 (14)          | 445 (13)          | 450 (15)        |                      |
|                                                | Missing                  | 43 (1)            | 29 (1)            | 14 (0)          |                      |
| <b>Opportunity to develop abilities</b>        | Very true                | 2217 (35)         | 1169 (34)         | 1048 (35)       | 0.003                |
|                                                | Somewhat true            | 2757 (43)         | 1431 (42)         | 1326 (45)       |                      |
|                                                | Not true                 | 1336 (21)         | 771 (23)          | 565 (19)        |                      |
|                                                | Missing                  | 57 (1)            | 34 (1)            | 23 (1)          |                      |
| <b>Have adequate training, info, equipment</b> | Often/sometimes          | 5485 (86)         | 2915 (86)         | 2570 (87)       | 0.210                |
|                                                | Rarely/never             | 840 (13)          | 463 (14)          | 377 (13)        |                      |
|                                                | Missing                  | 42 (1)            | 27 (1)            | 15 (1)          |                      |
| <b>Union representation</b>                    | Union member             | 620 (10)          | 294 (9)           | 326 (11)        | 0.005                |
|                                                | Not union member         | 3627 (57)         | 1975 (58)         | 1652 (56)       |                      |
|                                                | Missing                  | 2120 (33)         | 1136 (33)         | 984 (33)        |                      |
| <b>Control over schedule</b>                   | High control             | 1615 (25)         | 822 (24)          | 793 (27)        | 0.017                |
|                                                | Medium control           | 1916 (30)         | 1018 (30)         | 898 (30)        |                      |
|                                                | Low control              | 1532 (24)         | 866 (25)          | 666 (22)        |                      |
|                                                | Missing                  | 1304 (20)         | 699 (21)          | 605 (20)        |                      |
| <b>Employee involvement</b>                    | Often involved           | 2483 (39)         | 1284 (38)         | 1199 (40)       | 0.071                |
|                                                | Sometimes involved       | 2434 (38)         | 1314 (39)         | 1120 (38)       |                      |
|                                                | Rarely/never involved    | 1407 (22)         | 780 (23)          | 627 (21)        |                      |
|                                                | Missing                  | 43 (1)            | 27 (1)            | 16 (1)          |                      |
| <b>Workplace harassment/threats</b>            | Yes                      | 753 (12)          | 463 (14)          | 290 (10)        | <0.001               |
|                                                | No                       | 5569 (87)         | 2914 (86)         | 2655 (90)       |                      |
|                                                | Missing                  | 45 (1)            | 28 (1)            | 17 (1)          |                      |

Notes: <sup>a</sup> Chi square test comparing women and men.
